# Supplementary material for: Oxygen and pH responsive theragnostic liposomes for early-stage diagnosis and photothermal therapy of solid tumours
Source: Royal Society of Chemistry journal article supplement (doi:10.1039/d3bm01514a), 2023-12-12
Supplement: d3bm01514a1.pdf [file d3bm01514a1.pdf]

*Electronic Supplementary Information*

**Oxygen and pH responsive theragnostic liposome for early-stage diagnosis and photothermal therapy of solid tumour**

Siyi Li,<sup>a</sup> Qinglin Wang,<sup>a</sup> Yingying Ren,<sup>a</sup> Pengfei Zhong,<sup>b,c</sup> Pengtao Bao,<sup>c</sup> Shanyue Guan,<sup>\*d</sup> Xiaochen Qiu<sup>\*e</sup> and Xiaozhong Qu<sup>\*a,f</sup>

<sup>a</sup> Center of Materials Science and Optoelectronics Engineering, College of Materials Science and Opto-Electronic Technology, University of Chinese Academy of Sciences, Beijing 101408, China.

<sup>b</sup> Hebei North University, Hebei 075000, China.

<sup>c</sup> The Eighth Medical Center, Chinese PLA General Hospital, Beijing 100094, China.

<sup>d</sup> Key Laboratory of Photochemical Conversion and Optoelectronic Materials, Technical Institute of Physics and Chemistry, Chinese Academy of Sciences, Beijing 100190, China.

<sup>e</sup> Department of General Surgery, the First Medical Center of Chinese PLA General Hospital, Beijing, 100853, China.

<sup>f</sup> Binzhou Institute of Technology, Weiqiao-UCAS Science and Technology Park, Shandong 256606, China.

\* Email: quxz@ucas.ac.cn (X.Q.), guanshanyue@mail.ipc.ac.cn (S.G.), qiuxiaochen1987@163.com (X.Q.).

## Supplementary Figures

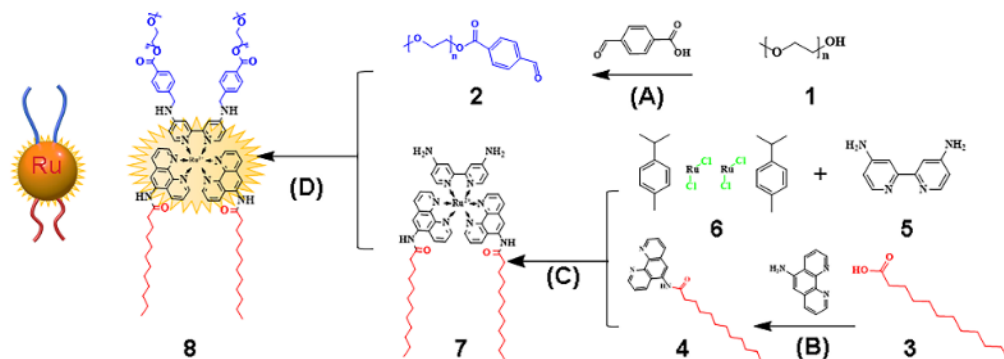

**Figure S1.** The synthetic route of amphiphilic ruthenium complex, i.e. C<sub>12</sub>-RuA<sub>2</sub>D-PEG<sub>2K</sub>. (A) DCC, DMAP, DCM, IPA. (B) EDC, DMAP, DCM. (C) Ethanol, acetone. (D) Methyl alcohol. 1. mPEG<sub>2K</sub>, 2. mPEG<sub>2K</sub>-CHO, 3. Lauric acid, 4. C<sub>12</sub>-grafted phenanthroline, 5. 4,4'-Diamino-2,2'-bipyridine, 6. Dichloro(p-cymene)ruthenium(II) dimer, 7. C<sub>12</sub>-RuA<sub>2</sub>D, 8. C<sub>12</sub>-RuA<sub>2</sub>D-PEG<sub>2K</sub>.

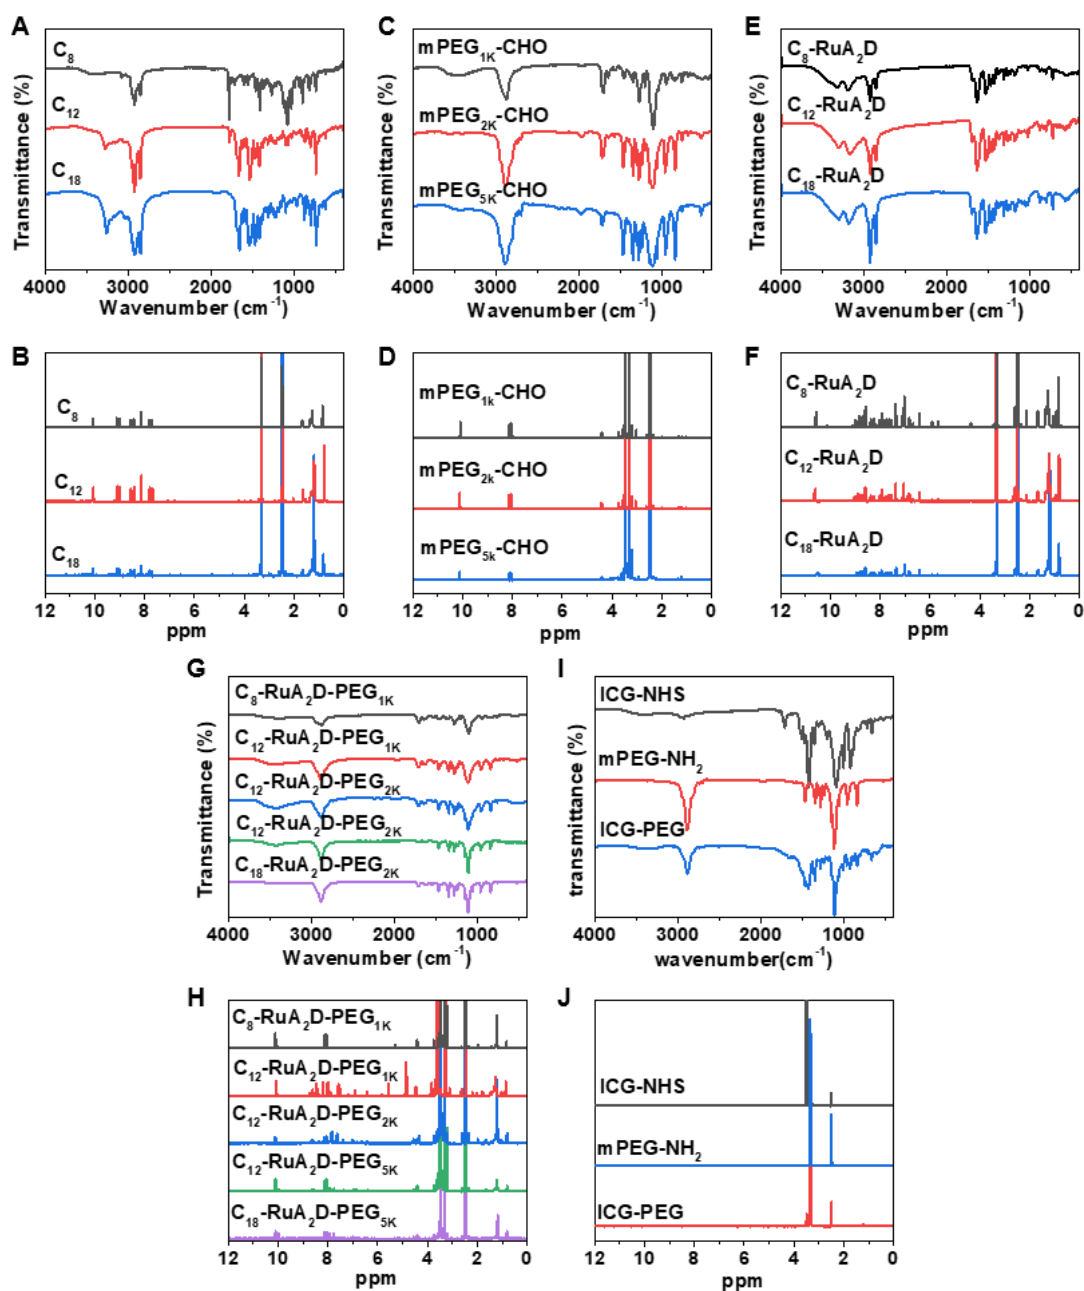

**Figure S2.** FTIR spectra (A, C, E, G) and <sup>1</sup>H NMR spectra (B, D, F, H) of alkyl chain (C<sub>8</sub>, C<sub>12</sub>, C<sub>18</sub>) modified phenanthroline, i.e. C<sub>n</sub>-grafted phenanthroline (A, B), benzaldehyde capped mPEG (mPEG-CHO) with different molecular weight (C, D), alkyl chain (C<sub>8</sub>, C<sub>12</sub>, C<sub>18</sub>) modified ruthenium complex, i.e. C<sub>n</sub>-RuA<sub>2</sub>D (E, F), amphiphilic ruthenium complex, i.e. C<sub>n</sub>-RuA<sub>2</sub>D-PEG (G, H) and the reagent as well as the product of PEGylated ICG, i.e. ICG-PEG (I, J).

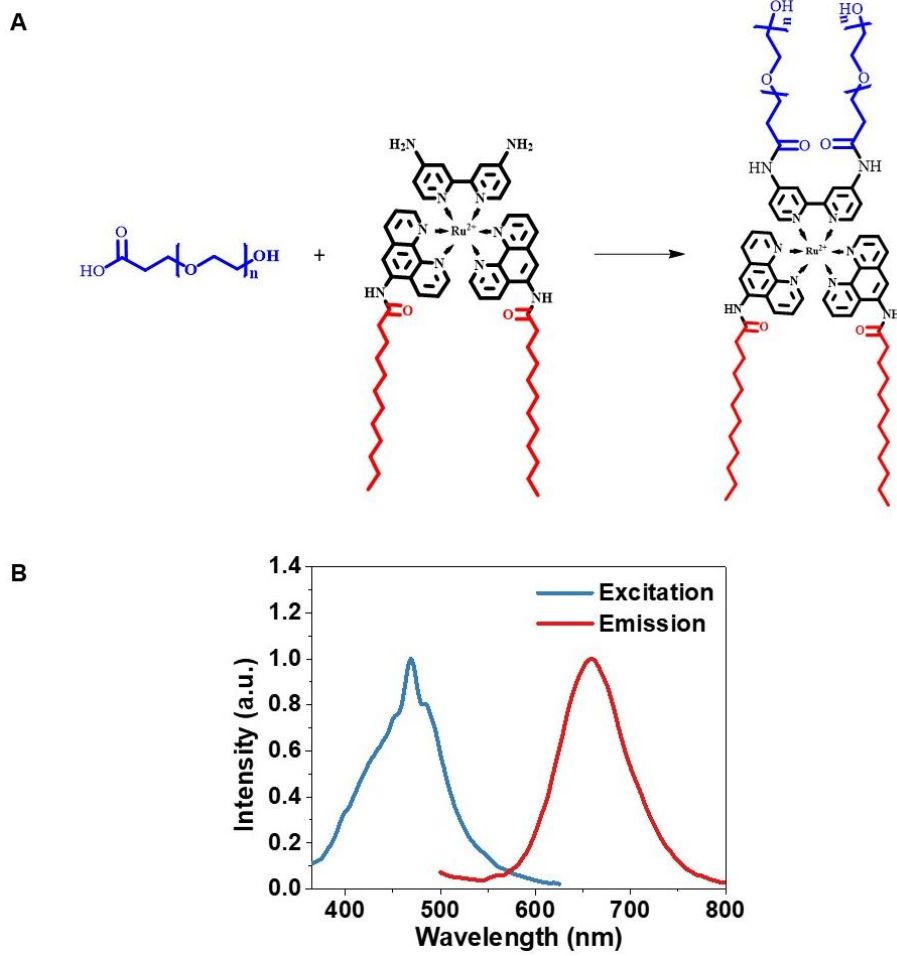

**Figure S3.** (A) The synthetic route of pH insensitive PEGylated C<sub>12</sub>-RuA<sub>2</sub>D. (B) Excitation and emission spectra of the pH insensitive PEGylated C<sub>12</sub>-RuA<sub>2</sub>D.

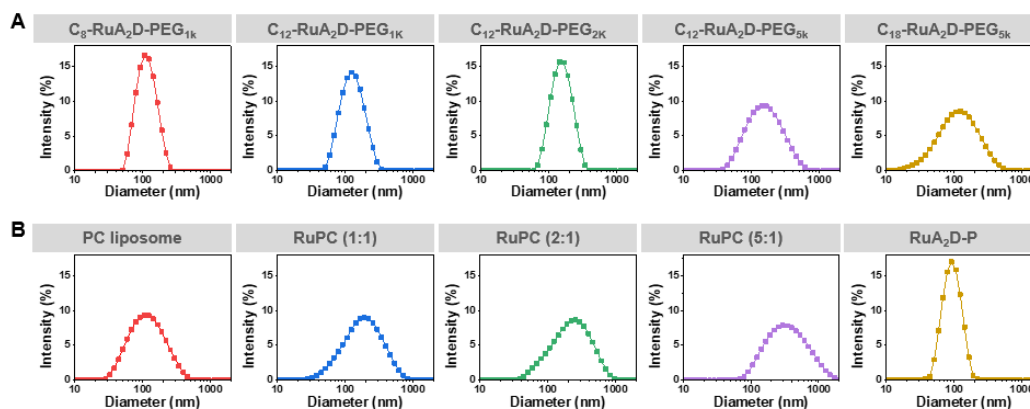

**Figure S4.** (A) DLS of  $C_n$ -RuA<sub>2</sub>D-PEG self-assemblies with different alkyl and PEG chain lengths. (B) DLS of phosphatidylcholine (PC) liposome, C<sub>12</sub>-RuA<sub>2</sub>D-PEG<sub>2K</sub> co-assemblies (RuPC) with different ruthenium complex-to-PC weight ratio, and the sonicated dispersion of C<sub>12</sub>-RuA<sub>2</sub>D-PEG<sub>2K</sub> (RuA<sub>2</sub>D-P). In the co-assemblies, cholesterol was added at a weight ratio of 0.1 to the mass of PC.

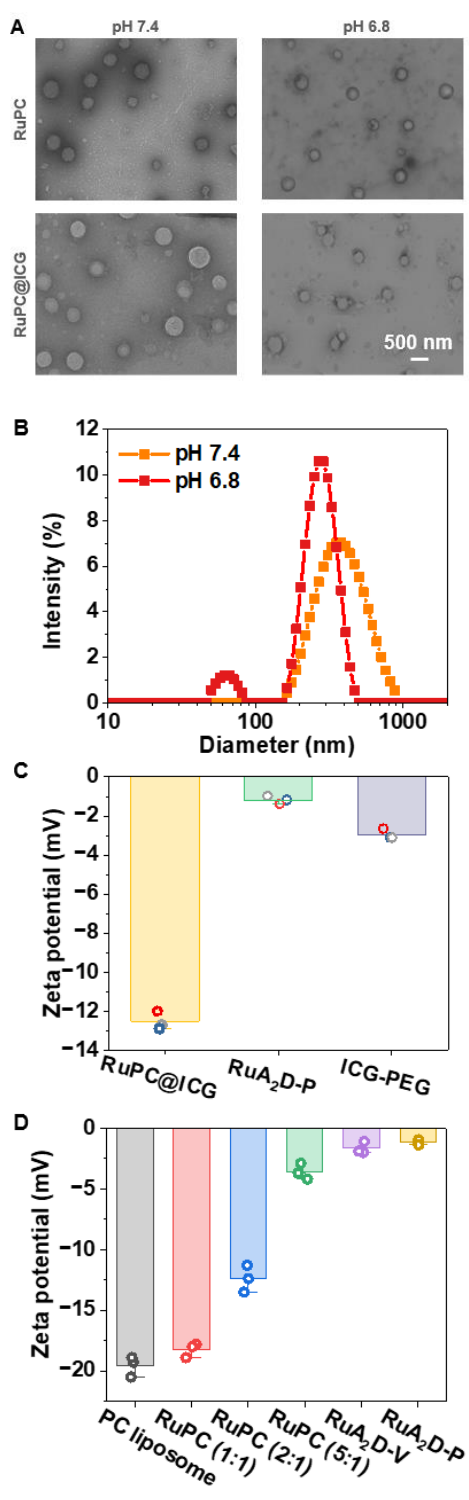

**Figure S5.** (A) TEM of RuPC and ICG-PEG loaded RuPC (RuPC@ICG) prepared from PBS dispersion at pH 7.4 or pH 6.8. (B) DLS of RuPC@ICG in PBS at pH 7.4 or pH 6.8. (C) Zeta potentials of RuPC@ICG, ICG-PEG and RuA<sub>2</sub>D-P in PBS (pH 7.4). (D) Zeta potentials of self-assembled, co-assembled C<sub>12</sub>-RuA<sub>2</sub>D-PEG<sub>2K</sub> and RuA<sub>2</sub>D-P.

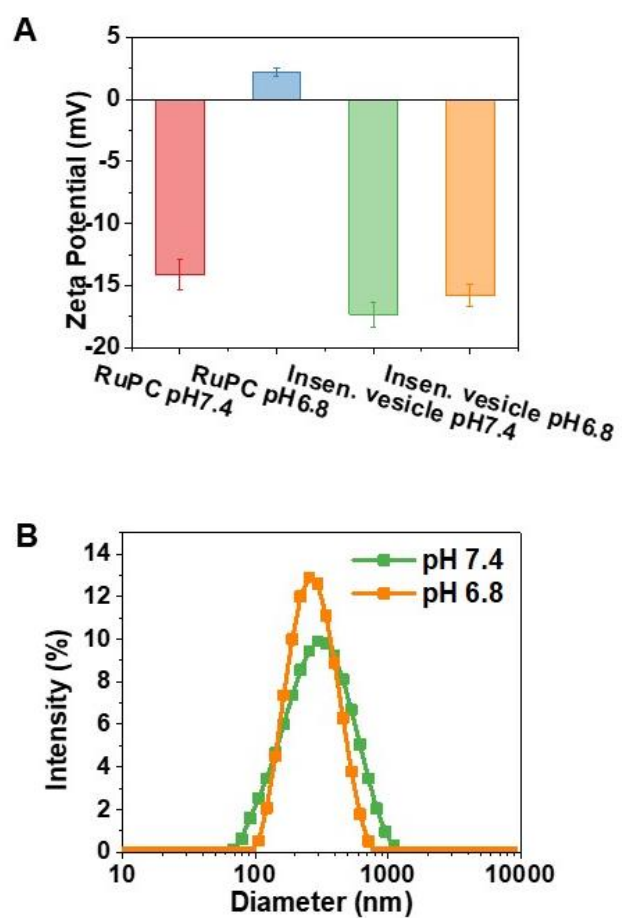

**Figure S6.** (A) Zeta potentials of RuPC and pH insensitive vesicle formed by pH insensitive PEGylated C<sub>12</sub>-RuA<sub>2</sub>D and PC in PBS at pH 7.4 or pH 6.8. (B) DLS of pH insensitive RuPC vesicle in PBS at pH 7.4 or pH 6.8.

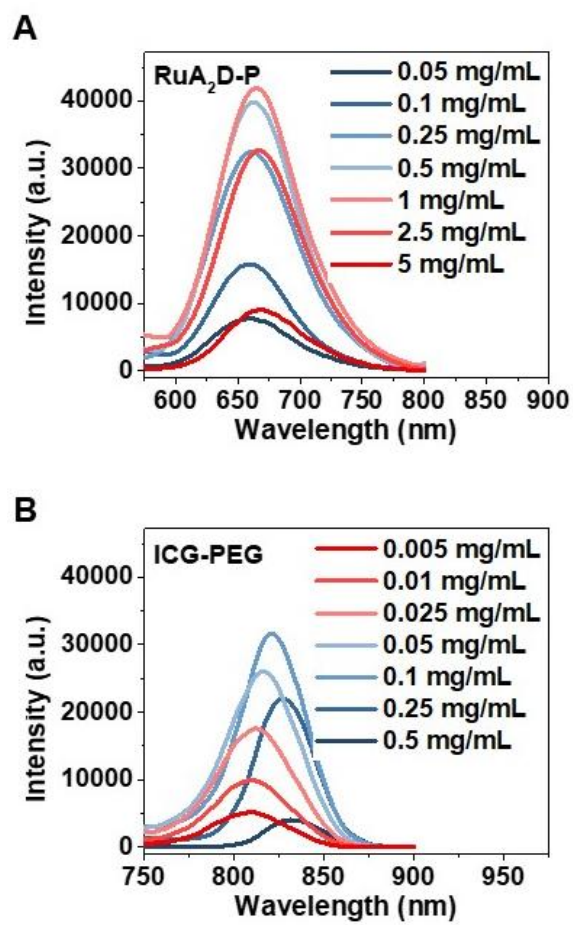

**Figure S7.** Fluorescence spectra of RuA<sub>2</sub>D-P (A) and ICG-PEG (B) in PBS (pH 7.4) at different concentrations.



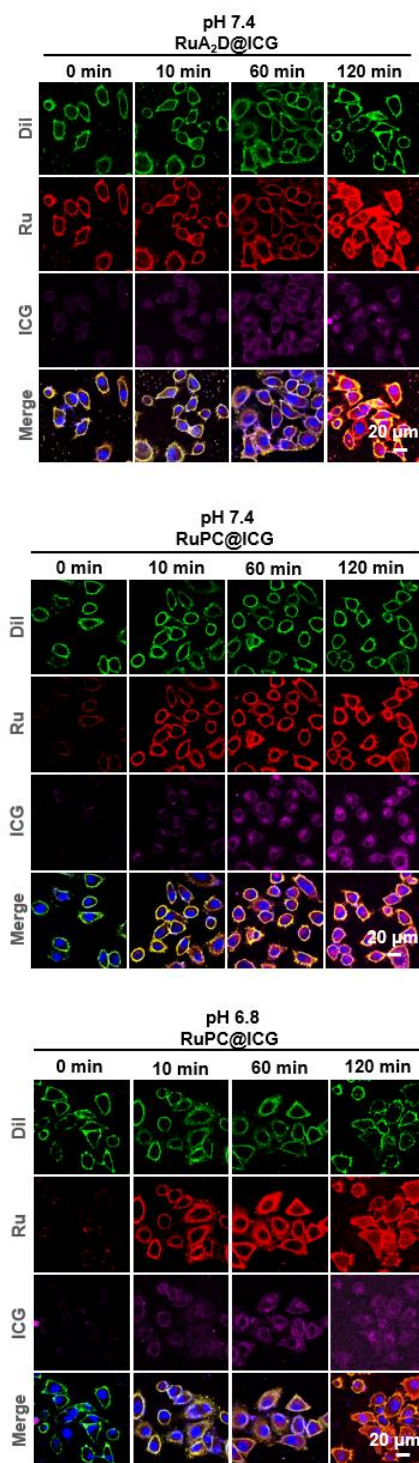

**Figure S8.** LCSM images of HeLa cells incubated with ICG-PEG encapsulated self-assembled C<sub>12</sub>-RuA<sub>2</sub>D-PEG<sub>2K</sub> vesicles (RuA<sub>2</sub>D@ICG) and RuPC@ICG for different times at pH 7.4 or 6.8. The concentration of RuA<sub>2</sub>D@ICG and RuPC@ICG was 200 μg mL<sup>-1</sup>.

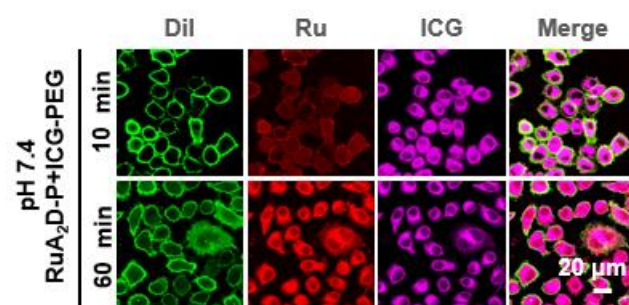

**Figure S9.** LCSM of HeLa cells incubated with the mixture of RuA<sub>2</sub>D-P (200 μg mL<sup>-1</sup>) and ICG-PEG (50 μg mL<sup>-1</sup>) for different time at pH 7.4.

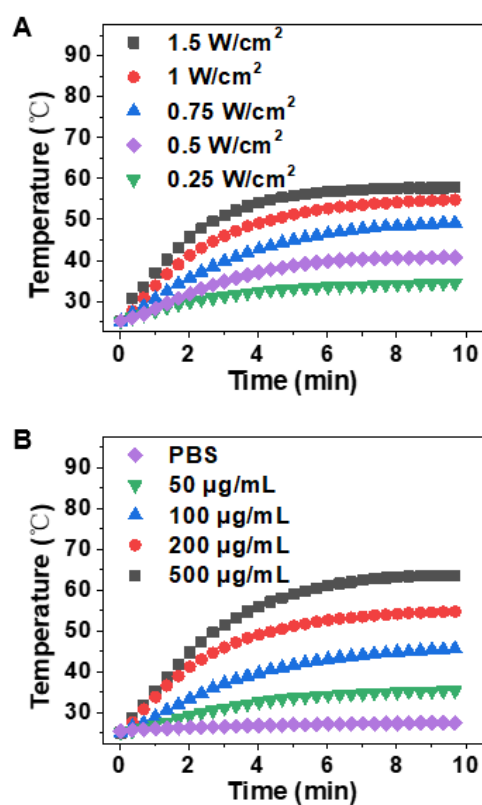

**Figure S10.** Influence of irradiation power (A) and sample concentration (B) on the photothermal effect of RuPC@ICG liposome in PBS under 808 nm excitation. (A) The concentration of ICG-PEG in RuPC@ICG dispersion was kept at 200  $\mu\text{g mL}^{-1}$ . (B) The irradiation power was 1  $\text{W cm}^{-2}$ .

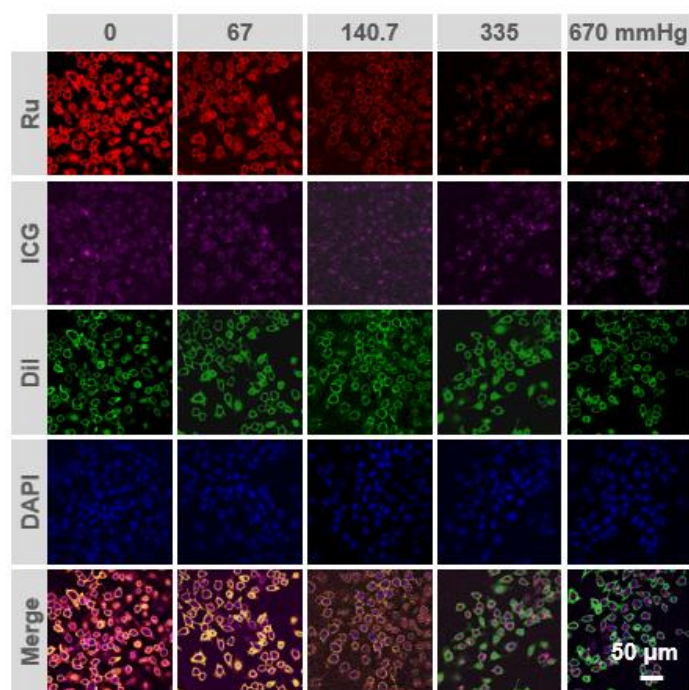

**Figure S11.** LCSM images HeLa cells incubated with RuPC@ICG liposome ( $200 \mu\text{g mL}^{-1}$ ) in culture medium (pH 7.4) with different oxygen partial pressure.

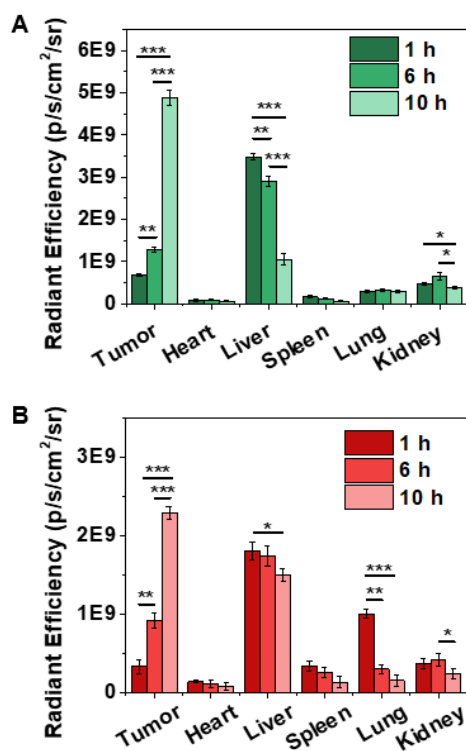

**Figure S12.** Quantitative analysis of *ex vivo* emission intensity of ICG (A) and ruthenium (B) in major organs and tumour tissue of tumour bearing mice ( $n = 3$ ) after being dosed by RuPC@ICG *via* intravenous injection for 1 h, 6 h and 10 h.
